# Supplementary material for: Purple tea water extract blocks RANKL-induced osteoclastogenesis through modulation of Akt/GSK3β and Blimp1-Irf8 pathways
Source: Royal Society of Chemistry journal article supplement (doi:10.1039/d2fo00780k), 2022-01-01

## c-Fos

RANKL: - + + + + + + + +  
PTE: - - + - + - + - +

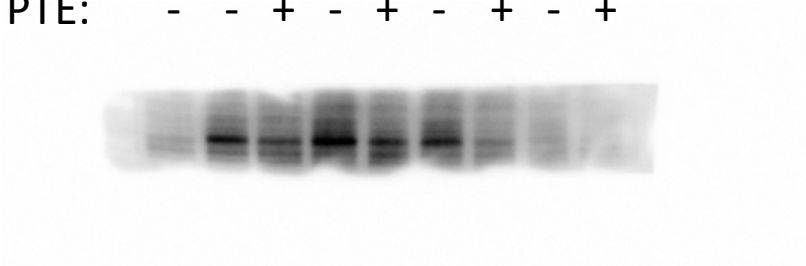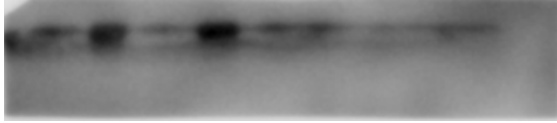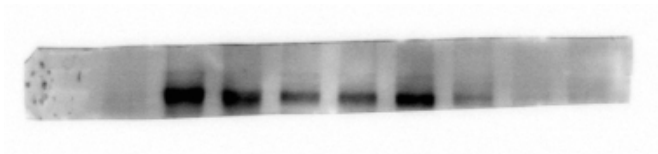

## GAPDH

RANKL: - + + + + + + + +  
PTE: - - + - + - + - +

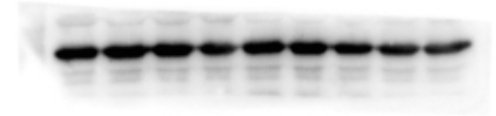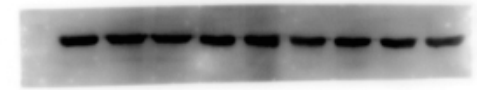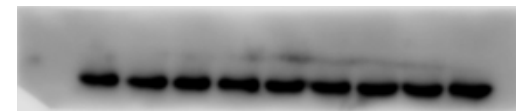

p-p65

TIME: 0 10 20 30  
RANKL: - + + + + + +  
PTE: - - + - + - +

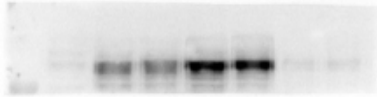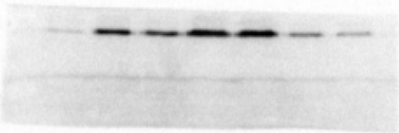

p65

TIME: 0 10 20 30  
RANKL: - + + + + + +  
PTE: - - + - + - +

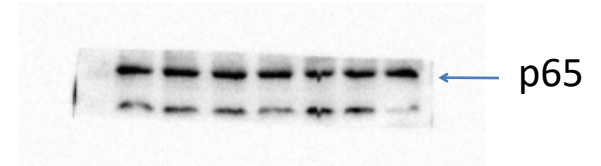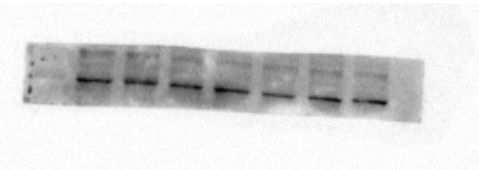

TIME: 0 15 30 45 60  
RANKL: - + + + + + + + +  
PTE: - - + - + - + - +

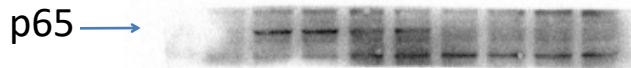

TIME: 0 15 30 45 60  
RANKL: - + + + + + + + +  
PTE: - - + - + - + - +

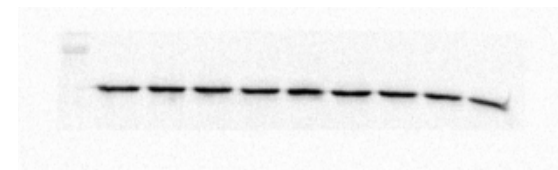

I $\kappa$ B- $\alpha$

TIME: 0 10 20 30  
RANKL: - + + + + + +  
PTE: - - + - + - +

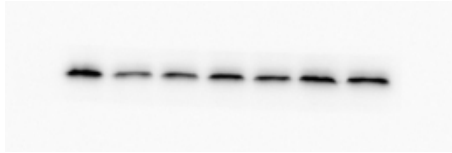

GAPDH

TIME: 0 10 20 30  
RANKL: - + + + + + +  
PTE: - - + - + - +

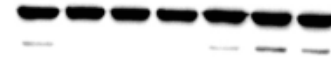

TIME: 0 15 30 45 60  
RANKL: - + + + + + + +  
PTE: - - + - + - + - +

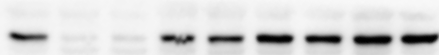

TIME: 0 15 30 45 60  
RANKL: - + + + + + + +  
PTE: - - + - + - + - +

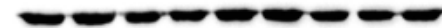

p-p38

TIME: 0 10 20 30  
RANKL: - + + + + + +  
PTE: - - + - + - +

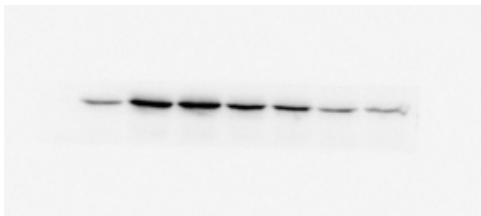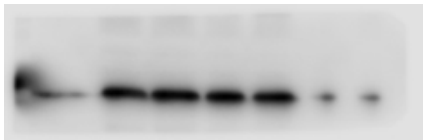

TIME: 0 15 30 45 60  
RANKL: - + + + + + + +  
PTE: - - + - + - + - +

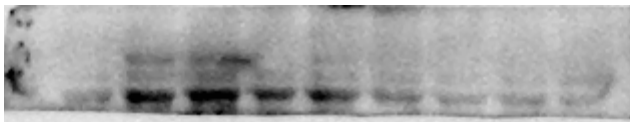

p38

TIME: 0 10 20 30  
RANKL: - + + + + + +  
PTE: - - + - + - +

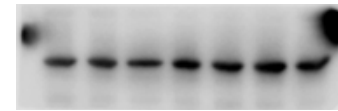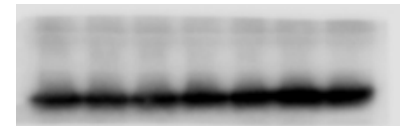

TIME: 0 15 30 45 60  
RANKL: - + + + + + + +  
PTE: - - + - + - + - +

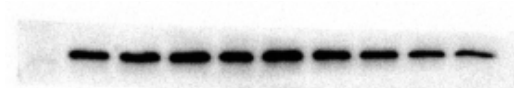

p-JNK

TIME: 0 10 20 30  
RANKL: - + + + + + +  
PTE: - - + - + - +

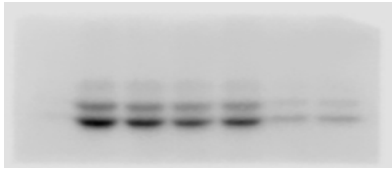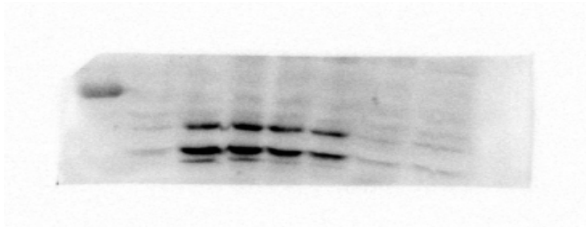

TIME: 0 15 30 45 60  
RANKL: - + + + + + + +  
PTE: - - + - + - + - +

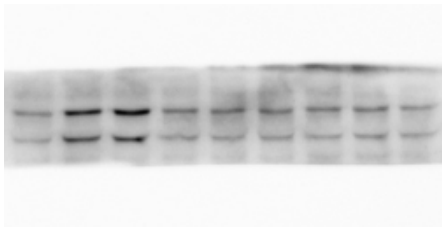

JNK

TIME: 0 10 20 30  
RANKL: - + + + + + +  
PTE: - - + - + - +

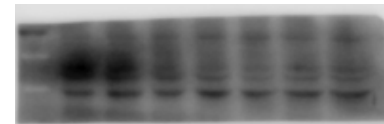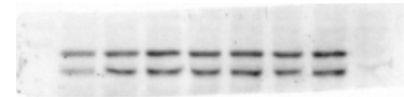

TIME: 0 15 30 45 60  
RANKL: - + + + + + + +  
PTE: - - + - + - + - +

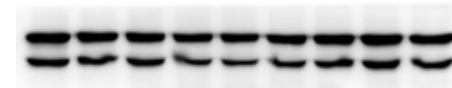

p-ERK

TIME: 0 10 20 30  
RANKL: - + + + + + +  
PTE: - - + - + - +

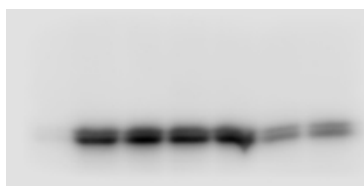

ERK

TIME: 0 10 20 30  
RANKL: - + + + + + +  
PTE: - - + - + - +

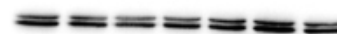

TIME: 0 15 30 45 60  
RANKL: - + + + + + + +  
PTE: - - + - + - + - +

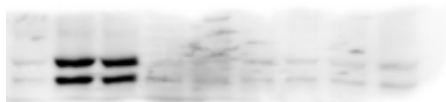

TIME: 0 15 30 45 60  
RANKL: - + + + + + + +  
PTE: - - + - + - + - +

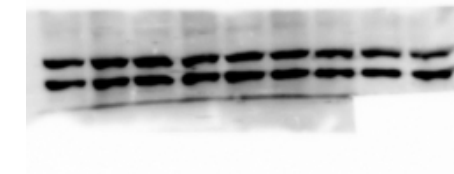

# p-Akt

RANKL: - + + + + + + + +  
PTE: - - + - + - + - +

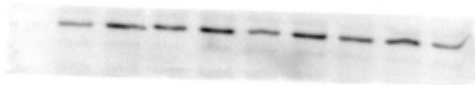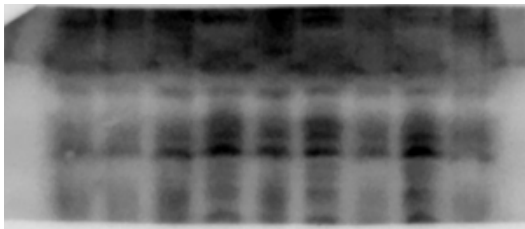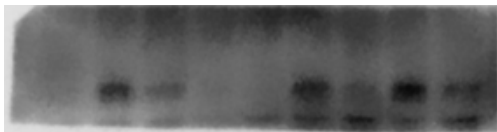

# Akt

RANKL: - + + + + + + + +  
PTE: - - + - + - + - +

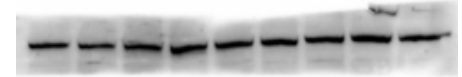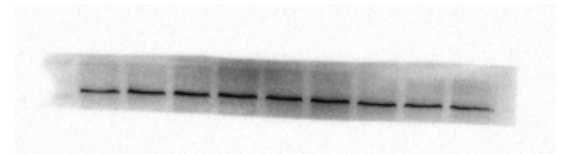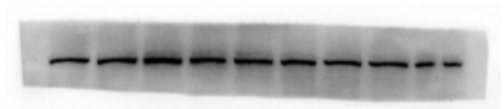



# p-GSK3 $\beta$

RANKL: - + + + + + + + +  
PTE: - - + - + - + - +

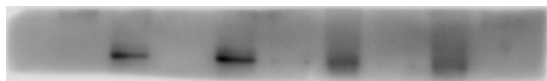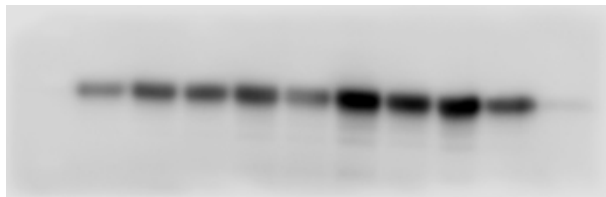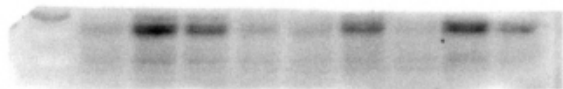

# GSK3 $\beta$

RANKL: - + + + + + + + +  
PTE: - - + - + - + - +

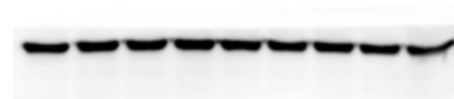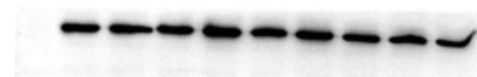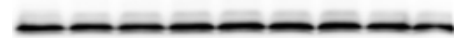

# Blimp1

RANKL: - + + + + + + + +  
PTE: - - + - + - + - +

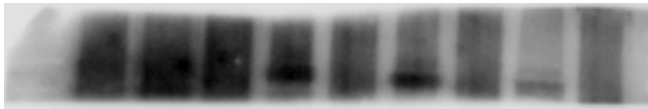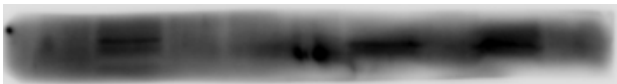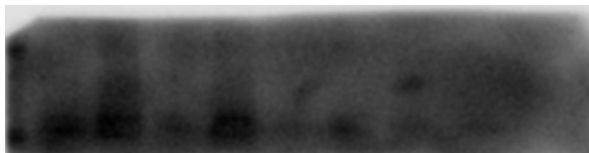

# GAPDH

RANKL: - + + + + + + + +  
PTE: - - + - + - + - +

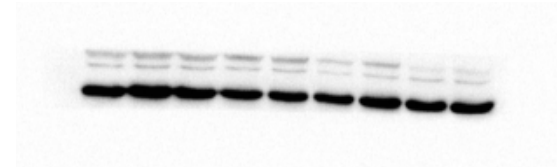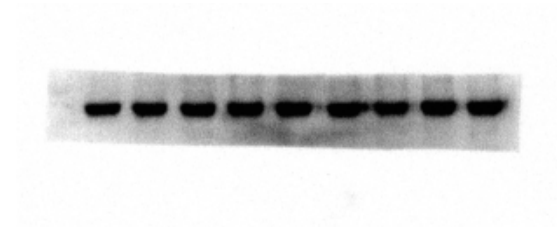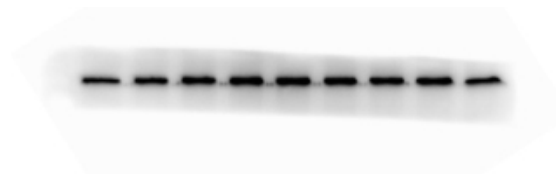

# Irf8

RANKL: - + + + + + + + +  
PTE: - - + - + - + - +

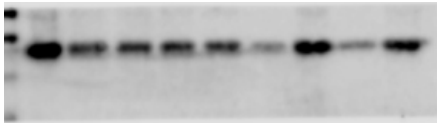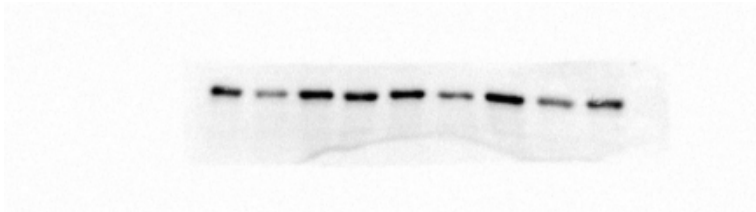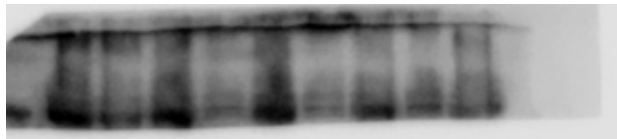

# GAPDH

RANKL: - + + + + + + + +  
PTE: - - + - + - + - +

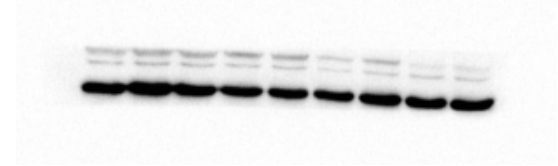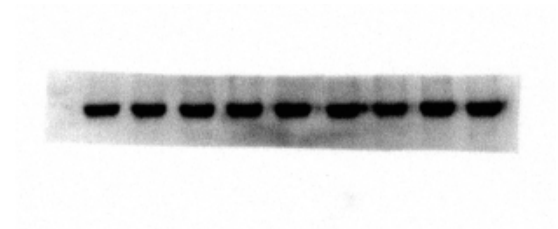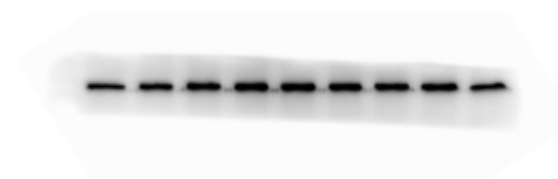

Supplement: d2fo00780k1.pdf [file d2fo00780k1.pdf]
